# Supplementary material for: Prevalence of Infectious Diseases in Children at Preschool Education Institutions and Stakeholder Opinions
Source: MDPI journal article supplement (doi:10.3390/children11040447), 2024-04-08
Supplement: s1 [file s1]

## Supplementary Materials

**Table S1.** Socio-demographic characteristics of teachers (n=46)

| Characteristics (n=46)                   | n        | %     |
|------------------------------------------|----------|-------|
| <b>Gender</b>                            |          |       |
| Female                                   | 46       | 100.0 |
| Male                                     | 0        | 0.0   |
| <b>Age (years)</b>                       |          |       |
| 30-34                                    | 5        | 10.9  |
| 35-39                                    | 13       | 28.3  |
| 40-44                                    | 22       | 47.8  |
| 45-49                                    | 6        | 13.1  |
| <b>Education status</b>                  |          |       |
| Bachelors degree                         | 39       | 84.8  |
| Master's or doctorate degree             | 7        | 15.2  |
| <b>Working time as a teacher</b>         |          |       |
| 6-10                                     | 4        | 8.7   |
| 11 or above                              | 42       | 91.3  |
| <b>Classroom type</b>                    |          |       |
| Independent preschool institution        | 29       | 63.3  |
| Preschool affiliated with primary school | 17       | 37.0  |
| <b>Working age group (years)</b>         |          |       |
| 3 age groups                             | 2        | 4.3   |
| 4 age groups                             | 11       | 23.9  |
| 5 age groups                             | 33       | 71.7  |
| <b>Age (years) M ± SD</b>                | 39.8±4.2 |       |

**Table S2.** Socio-demographic characteristics of parents.

| <b>Characteristics (n=397)</b>            | <b>n</b> | <b>%</b> |
|-------------------------------------------|----------|----------|
| <b>Parents</b>                            |          |          |
| Mother                                    | 369      | 92.2     |
| Father                                    | 28       | 7.1      |
| <b>Mother's age (years)</b>               |          |          |
| 20-29                                     | 89       | 22.4     |
| 30-39                                     | 261      | 65.7     |
| 40-49                                     | 47       | 11.8     |
| <b>Father's age (years)</b>               |          |          |
| 20-29                                     | 9        | 2.3      |
| 30-39                                     | 275      | 69.3     |
| 40-49                                     | 106      | 26.7     |
| 50-59                                     | 7        | 1.8      |
| <b>Education status of mother</b>         |          |          |
| Primary education                         | 75       | 18.9     |
| High school                               | 125      | 31.5     |
| Bachelor's degree                         | 169      | 42.6     |
| Master's or doctorate degree              | 28       | 7.1      |
| <b>Education status of father</b>         |          |          |
| Primary education                         | 62       | 15.6     |
| High school                               | 134      | 33.8     |
| Bachelor's degree                         | 160      | 40.3     |
| Master's or doctorate degree              | 41       | 10.3     |
| <b>Mother's profession</b>                |          |          |
| Housewife                                 | 243      | 61.2     |
| Officer                                   | 25       | 6.3      |
| Teacher-educator/academic                 | 36       | 9.1      |
| Law enforcement                           | 4        | 1.0      |
| Worker                                    | 36       | 9.1      |
| Health personnel                          | 38       | 9.6      |
| Small business                            | 15       | 3.8      |
| <b>Father's profession</b>                |          |          |
| Retired                                   | 8        | 2.0      |
| Officer                                   | 56       | 14.1     |
| Teacher-educator/academic                 | 43       | 10.8     |
| Law enforcement                           | 36       | 9.1      |
| Worker                                    | 142      | 35.8     |
| Health personnel                          | 25       | 6.3      |
| Small business                            | 52       | 13.1     |
| Freelance                                 | 35       | 8.8      |
| <b>Economic status</b>                    |          |          |
| Good                                      | 29       | 7.3      |
| Moderate                                  | 350      | 88.2     |
| Poor                                      | 18       | 4.5      |
| <b>Number of children</b>                 |          |          |
| 1                                         | 119      | 30.0     |
| 2                                         | 180      | 45.3     |
| 3                                         | 86       | 21.7     |
| 4                                         | 10       | 2.5      |
| 5                                         | 2        | 0.5      |
| <b>Age of mothers (years) M ± SD</b>      | 33.4±4.8 |          |
| <b>Age of fathers (years) M ± SD</b>      | 37.0±4.8 |          |
| <b>Number of children (number) M ± SD</b> | 1.9±0.8  |          |

**Table S3.** Some characteristics and health conditions of children.

| Characteristics (n=397)                                    | n       | %    |
|------------------------------------------------------------|---------|------|
| <b>Age (years)</b>                                         |         |      |
| 3                                                          | 19      | 4.8  |
| 4                                                          | 72      | 18.1 |
| 5                                                          | 306     | 77.1 |
| <b>Birth order</b>                                         |         |      |
| 1                                                          | 187     | 47.1 |
| 2                                                          | 140     | 35.3 |
| 3                                                          | 59      | 14.9 |
| 4                                                          | 11      | 2.8  |
| <b>Mode of delivery</b>                                    |         |      |
| Normal birth                                               | 149     | 37.5 |
| Cesarean section                                           | 248     | 62.5 |
| <b>Birth term</b>                                          |         |      |
| Maturity birth                                             | 310     | 78.1 |
| Preterm birth                                              | 64      | 16.1 |
| Postmaturity birth                                         | 23      | 5.8  |
| <b>Breastfeeding time</b>                                  |         |      |
| 0-6 months                                                 | 80      | 20.2 |
| 7-12 months                                                | 34      | 8.6  |
| 13-18 months                                               | 69      | 17.4 |
| 19-24 months                                               | 139     | 35.0 |
| 25-30 months                                               | 49      | 12.3 |
| 31-36 months                                               | 15      | 3.8  |
| 37 months and over                                         | 11      | 2.8  |
| <b>Chronic disease in child</b>                            |         |      |
| No                                                         | 368     | 92.7 |
| Yes                                                        | 29      | 7.3  |
| <b>Distribution of chronic diseases (n=29)</b>             |         |      |
| Asthma                                                     | 21      | 72.4 |
| Epilepsy                                                   | 4       | 13.8 |
| Familial Mediterranean Fever                               | 3       | 10.4 |
| Cerebral palsy                                             | 1       | 3.4  |
| <b>Allergy in child</b>                                    |         |      |
| No                                                         | 345     | 86.9 |
| Yes                                                        | 52      | 13.1 |
| <b>Regular and complete status of vaccinations</b>         |         |      |
| No                                                         | 10      | 2.5  |
| Yes                                                        | 387     | 97.5 |
| <b>Mother's smoking while pregnant</b>                     |         |      |
| Never                                                      | 361     | 90.9 |
| Rarely                                                     | 23      | 5.8  |
| Sometimes                                                  | 7       | 1.8  |
| Mostly                                                     | 6       | 1.5  |
| <b>Is there a parent who smokes in the house?</b>          |         |      |
| No                                                         | 192     | 48.4 |
| Yes                                                        | 205     | 51.6 |
| <b>Type of pre-school education institution registered</b> |         |      |
| Public school/Free                                         | 296     | 74.6 |
| Private school/Paid                                        | 61      | 15.4 |
| Public school/Paid                                         | 40      | 10.1 |
| <b>Classroom type</b>                                      |         |      |
| Independent preschool institution                          | 199     | 50.1 |
| Preschool affiliated with primary school                   | 198     | 49.9 |
| <b>Age of children (years) M ± SD</b>                      | 4.7±0.5 |      |

**Table S4.** Comparison of the frequency of illness of children who got sick after the opening of schools according to some characteristics.

| Characteristics (n=376)                                    | n   | Mean | SD    | t*/F** | p            |
|------------------------------------------------------------|-----|------|-------|--------|--------------|
| <b>Age (years)</b>                                         |     |      |       |        |              |
| 3                                                          | 18  | 3.72 | 2.052 | 0.713  | 0.491        |
| 4                                                          | 70  | 3.81 | 2.066 |        |              |
| 5                                                          | 288 | 3.50 | 2.080 |        |              |
| <b>Mode of delivery</b>                                    |     |      |       |        |              |
| Normal birth                                               | 140 | 3.51 | 2.103 | -0.375 | 0.708        |
| Cesarean section                                           | 236 | 3.60 | 2.062 |        |              |
| <b>Birth term</b>                                          |     |      |       |        |              |
| Maturity birth <sup>a</sup>                                | 294 | 3.40 | 1.969 | 4.634  | <b>0.010</b> |
| Preterm birth <sup>b</sup>                                 | 62  | 4.11 | 2.277 |        |              |
| Postmaturity birth <sup>a,b</sup>                          | 20  | 4.35 | 2.540 |        |              |
| <b>Breastfeeding time</b>                                  |     |      |       |        |              |
| 0-6 months                                                 | 77  | 3.83 | 2.148 | 0.725  | 0.630        |
| 7-12 months                                                | 31  | 3.81 | 2.151 |        |              |
| 13-18 months                                               | 64  | 3.33 | 1.968 |        |              |
| 19-24 months                                               | 131 | 3.56 | 2.012 |        |              |
| 25-30 months                                               | 47  | 3.45 | 2.030 |        |              |
| 31-36 months                                               | 15  | 2.93 | 1.668 |        |              |
| 37 months and over                                         | 11  | 3.91 | 3.270 |        |              |
| <b>Chronic disease in child</b>                            |     |      |       |        |              |
| No                                                         | 349 | 3.52 | 2.064 | -1.612 | 0.108        |
| Yes                                                        | 27  | 4.19 | 2.149 |        |              |
| <b>Allergy in child</b>                                    |     |      |       |        |              |
| No                                                         | 326 | 3.50 | 2.051 | -1.516 | 0.130        |
| Yes                                                        | 50  | 3.98 | 2.199 |        |              |
| <b>Regular and complete status of vaccinations</b>         |     |      |       |        |              |
| No                                                         | 9   | 2.78 | 1.856 | 0.884  | 0.249        |
| Yes                                                        | 367 | 3.59 | 2.078 |        |              |
| <b>Is there a parent who smokes in the house?</b>          |     |      |       |        |              |
| No                                                         | 180 | 3.59 | 2.134 | 0.657  | 0.803        |
| Yes                                                        | 196 | 3.54 | 2.024 |        |              |
| <b>Type of pre-school education institution registered</b> |     |      |       |        |              |
| Public school/Free <sup>a</sup>                            | 279 | 3.42 | 2.032 | 3.513  | <b>0.031</b> |
| Private school/Paid <sup>b</sup>                           | 59  | 4.20 | 2.164 |        |              |
| Public school/Paid <sup>a,b</sup>                          | 38  | 3.63 | 2.111 |        |              |
| <b>Classroom type</b>                                      |     |      |       |        |              |
| Independent kindergarten                                   | 194 | 3.80 | 2.107 | 2.255  | <b>0.025</b> |
| Preschool affiliated with primary school                   | 182 | 3.32 | 2.016 |        |              |
| <b>Education status of mother</b>                          |     |      |       |        |              |
| Primary education <sup>a</sup>                             | 69  | 3.28 | 1.932 | 3.857  | <b>0.010</b> |
| High school <sup>a,b</sup>                                 | 118 | 3.90 | 2.178 |        |              |
| Bachelor's degree <sup>a</sup>                             | 162 | 3.31 | 1.931 |        |              |
| Master's or doctorate degree <sup>b</sup>                  | 27  | 4.41 | 2.454 |        |              |
| <b>Education status of father</b>                          |     |      |       |        |              |
| Primary education                                          | 58  | 3.69 | 2.062 | 0.350  | 0.789        |
| High school                                                | 124 | 3.48 | 2.014 |        |              |
| Bachelor's degree                                          | 155 | 3.52 | 2.109 |        |              |
| Master's or doctorate degree                               | 39  | 3.82 | 2.199 |        |              |
| <b>Economic status</b>                                     |     |      |       |        |              |
| Good                                                       | 28  | 3.71 | 2.192 | 0.372  | 0.689        |
| Moderate                                                   | 331 | 3.57 | 2.093 |        |              |
| Poor                                                       | 17  | 3.18 | 1.510 |        |              |

\*Independent samples t test

\*\*One-way ANOVA.

NOTE= Superscripts a and b indicate the difference between groups. There is no difference in groups with the same letters.

**Table S5.** Comparison of the frequency of sickness of children according to some views of parents of children who got sick after the opening of school on infectious diseases.

| Characteristics (n=376)                                                                                              | n   | Mean | SD    | t*/F** | p     |
|----------------------------------------------------------------------------------------------------------------------|-----|------|-------|--------|-------|
| Thinking you have knowledge about childhood infectious diseases                                                      |     |      |       |        |       |
| No                                                                                                                   | 30  | 3.27 | 1.507 | 0.599  | 0.550 |
| Yes                                                                                                                  | 207 | 3.53 | 2.106 |        |       |
| A little                                                                                                             | 139 | 3.69 | 2.136 |        |       |
| Do you ask the teacher to exclude students with ongoing infectious diseases?                                         |     |      |       |        |       |
| No                                                                                                                   | 224 | 3.54 | 2.051 | -0.349 | 0.727 |
| Yes                                                                                                                  | 152 | 3.61 | 2.116 |        |       |
| Do you warn other parents not to bring students with ongoing infectious diseases to class?                           |     |      |       |        |       |
| No                                                                                                                   | 268 | 3.54 | 2.108 | -0.429 | 0.668 |
| Yes                                                                                                                  | 108 | 3.64 | 1.997 |        |       |
| Do you think that students with ongoing infectious diseases in the classroom transmit the disease to other students? |     |      |       |        |       |
| No                                                                                                                   | 18  | 3.17 | 1.790 | -0.838 | 0.403 |
| Yes                                                                                                                  | 358 | 3.59 | 2.088 |        |       |
| Do you think your child is infected at school?                                                                       |     |      |       |        |       |
| No                                                                                                                   | 12  | 2.67 | 1.303 | 2.698  | 0.069 |
| Yes                                                                                                                  | 307 | 3.68 | 2.124 |        |       |
| Indecisive                                                                                                           | 57  | 3.16 | 1.850 |        |       |

\*Independent samples t test

\*\*One-way ANOVA.

NOTE= Superscripts a and b indicate the difference between groups. There is no difference in groups with the same letters.
